# Supplementary material for: Improvement of the thermoelectric performance of InSe-based alloys doped with Sn
Source: Royal Society of Chemistry journal article supplement (doi:10.1039/c5ra23023c), 2015-01-01
Supplement: c5ra23023c1.pdf [file c5ra23023c1.pdf]

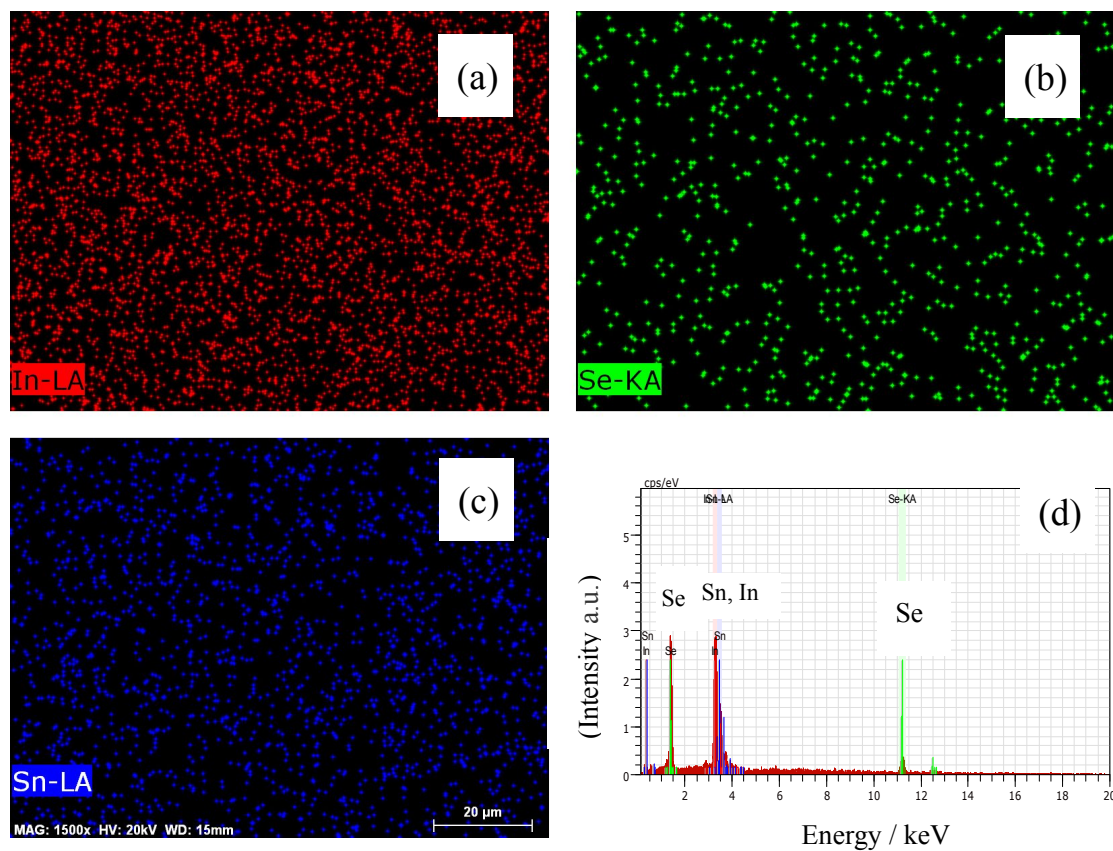

Fig.S1 EPMA mapping of three elements on polished InSeSn<sub>0.01</sub> surface (a) In, (b)Se, (c) Sn and (d) Energy dispersive x-ray spectrum.

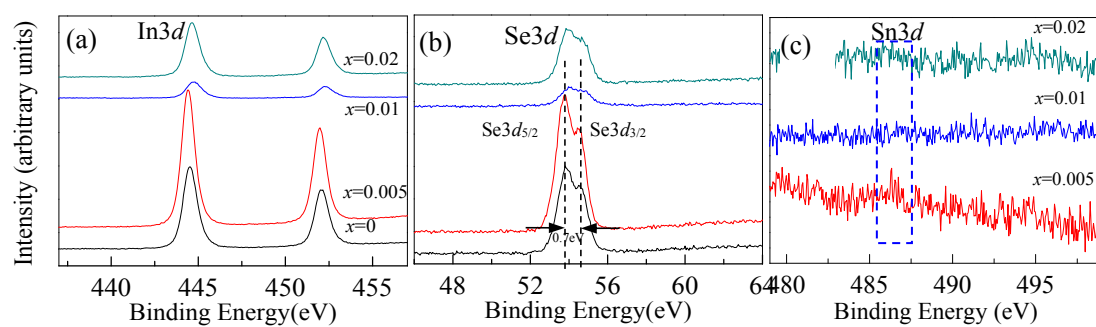

Fig.S2 XPS spectra of (a) In 3d, (b) Se 3d, and (c) Sn 3d for InSeSn<sub>x</sub>.

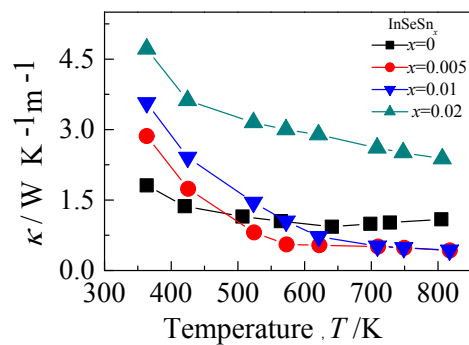

Fig.S3 Total thermal conductivities of InSeSn<sub>x</sub> in  $C_{\perp}$  ( $x=0, 0.005, 0.01, 0.02$ ) as a function of temperature.

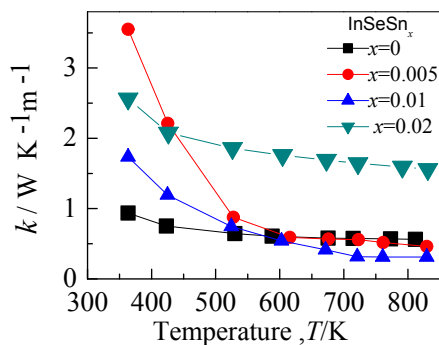

Fig.S4 Total thermal conductivities of InSeSn<sub>x</sub> in  $C_{\parallel}$  ( $x=0, 0.005, 0.01, 0.02$ ) as a function of temperature.

Table S1 The chemical compositions (relative molars) identified using EPMA for InSeSn<sub>x</sub> ( $x=0, 0.01$ ) (taken from mappings)

| Compounds              | In   | Sn    | Se   |
|------------------------|------|-------|------|
| InSe                   | 1.04 | ----- | 0.96 |
| InSeSn <sub>0.01</sub> | 1.0  | 0.02  | 0.99 |

Table S2 Binding energies from the  $\text{In}3d_{5/2}$ ,  $\text{Sn}3d_{5/2}$  and  $\text{Se}3d$  core-level photoelectron spectra for the  $\text{InSeSn}_x$  ( $x=0,0.005,0.01,0.02$ ) compounds.

| Compounds               | $\text{In}3d$ (eV) | $\text{Se}3d$ (eV)             | $\text{Sn}3d$ (eV) |
|-------------------------|--------------------|--------------------------------|--------------------|
| InSe                    | 444.53             | Peak 1: 53.85<br>Peak 2: 54.47 |                    |
| $\text{InSeSn}_{0.005}$ | 444.44             | Peak 1: 53.75<br>Peak 2: 54.43 | 486.29             |
| $\text{InSeSn}_{0.01}$  | 444.73             | Peak 1: 53.99<br>Peak 2: 54.59 | 485.95             |
| $\text{InSeSn}_{0.02}$  | 444.66             | Peak 1: 53.88<br>Peak 2: 54.59 | 485.80             |
